# Supplementary material for: Kinetics of active water/ethanol Janus droplets
Source: Royal Society of Chemistry journal article supplement (doi:10.1039/d0sm00460j), 2020-01-01
Supplement: d0sm00460j4.pdf [file d0sm00460j4.pdf]

Movie1: The ethanol concentration in the droplet is 50% in volume. Images are taken by pco HS1200. The scale bar is 100  $\mu\text{m}$ . The movie is in droplet frame.

Movie2: The ethanol concentration in the droplet is 100% for Stage 1, in which the dark area around the droplet is more obvious, and 50% in volume for Stage 2 and 3. Images are taken by Imager proX from Zeiss. 7  $\mu\text{g/ml}$  NBD, a fluorescent lipid (1-palmitoyl-2-12-[(7-nitro-2-1,3-benzoxadiazol-4-yl)amino]dodecanoyl-sn-glycero-3-phosphocholine) which has the similar chemical affinity as monoolein is added to squalane to visualize monoolein transport. The scale bar is 100  $\mu\text{m}$ . The movie is in droplet frame.

Movie3: The ethanol concentration in the droplet is 50% in volume. Images are taken by an sCMOS camera (Orca, Hamamatsu). The scale bar is 100  $\mu\text{m}$ . The movie is in droplet frame.
